# Supplementary material for: Negative Mood Is Associated with Diet and Dietary Antioxidants in University Students During the Menstrual Cycle: A Cross-Sectional Study from Guangzhou, China
Source: MDPI journal article supplement (doi:10.3390/antiox9010023), 2019-12-26
Supplement: s1 [file s1]

Supplementary Table 2

ID:

Date:

Height:

Weight:

Age:

Grade:

Food frequency questionnaire

For each food listed, fill in the circle indicating your average total consumption of the amount specified during the past week.

- ① Less than once per week      ② Once per week      ③ 2–3 times per week  
④ 4–6 times per week      ⑤ Once per day      ⑥ More than once per day

1. Staple foods

A. Rice and porridge ( )

B. Flour products (noodles, buns, steamed buns) ( )

2. Eggs, meat, and poultry

C. Red Meat (pork, lamb, beef) ( )

D. Poultry (chicken, duck, goose) ( )

C. Seafood (fish, shrimp, crab) ( )

E. Eggs ( )

3. Fruit, vegetables, and nuts

F. Fresh vegetables ( )

G. Fresh fruit and fresh juice ( )

H. Nuts ( )

4. Beverages

I. Tea, coffee, or carbonated beverages [[In the main text, you say “carbonated beverages”.]]

5. Dairy and soybean

J. Dairy (milk or skimmed milk, cheese, yoghurt) ( )

K. Soybean products ( )

6. Processed foods

L. Sweet foods (pastries, chocolate, ice cream, waffles, cakes, candies) ( )

M. Puffed grains ( )

N. Dried fruit or cured meat ( )

O. Fried foods ( )

P. Fast food ( )

8. Special foods

Q. Spirulina products ( )

R. Protein powder ( )

S. Melatonin products ( )

T. Bananas and red Chinese dates ()
